# Supplementary material for: Janus hollow polymeric hairy microspheres as efficient adsorbents and catalyst scaffolds
Source: Royal Society of Chemistry journal article supplement (doi:10.1039/c9qm00057g), 2019-01-01
Supplement: c9qm00057g1.pdf [file c9qm00057g1.pdf]

### **Supporting information**

#### **Janus hollow polymeric hairy microspheres as efficient adsorbents and catalyst scaffolds**

Guang Wu<sup>a</sup>, Lingling Zhao<sup>a,b\*</sup>, Hongze Liang<sup>a</sup>, Yinghua Yan<sup>a</sup>, Hui Tan<sup>b\*</sup>

a School of Materials Science and Chemical Engineering, Ningbo University, Ningbo, 315211, China.

b Health Science Center, The First Affiliated Hospital of Shenzhen University, Shenzhen, 518035, China.

\*Corresponding Author

E-mail: zhaolingling@nbu.edu.cn, huitan@email.szu.edu.cn

Table S1. Summary of synthetic conditions for the preparation of SiO<sub>2</sub>@PHS, SiO<sub>2</sub>@SPHS and HSPHS.

| Sample                   | DVB<br>(wt%) | BF <sub>3</sub> ·Et <sub>2</sub> O<br>(wt%) | Span 80<br>(wt%) | Polymerization<br>time (min) | Sulfonation<br>time (h) | HF<br>etching |
|--------------------------|--------------|---------------------------------------------|------------------|------------------------------|-------------------------|---------------|
| SiO <sub>2</sub> @PHS-1  | 1.5          | 0.18                                        | 0.168            | 1                            | —                       | —             |
| SiO <sub>2</sub> @PHS-2  | 1.5          | 0.18                                        | 0.168            | 8                            | —                       | —             |
| SiO <sub>2</sub> @PHS-3  | 1.5          | 0.18                                        | 0.24             | 8                            | —                       | —             |
| SiO <sub>2</sub> @SPHS-1 | 1.5          | 0.18                                        | 0.168            | 1                            | 1                       | —             |
| SiO <sub>2</sub> @SPHS-2 | 1.5          | 0.18                                        | 0.24             | 8                            | 1                       | —             |
| SiO <sub>2</sub> @SPHS-3 | 1.5          | 0.18                                        | 0.24             | 8                            | 12                      | —             |
| HSPHS-1                  | 1.5          | 0.18                                        | 0.168            | 8                            | 1                       | +             |
| HSPHS-2                  | 1.5          | 0.18                                        | 0.24             | 8                            | 1                       | +             |
| HSPHS-3                  | 1.5          | 0.18                                        | 0.24             | 8                            | 12                      | +             |
| HSPHS-4                  | 1.5          | 0.18                                        | 0.168            | 1                            | 1                       | +             |

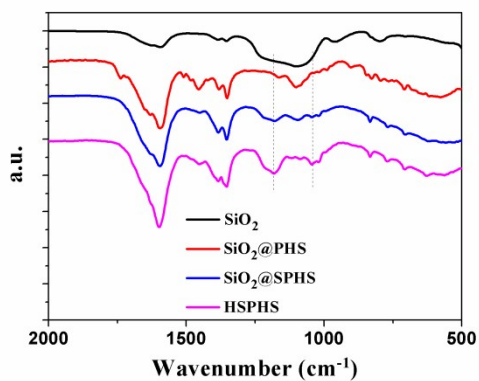

Figure S1 FT-IR spectra of SiO<sub>2</sub>, SiO<sub>2</sub>@PHS, SiO<sub>2</sub>@SPHS and HSPHS.

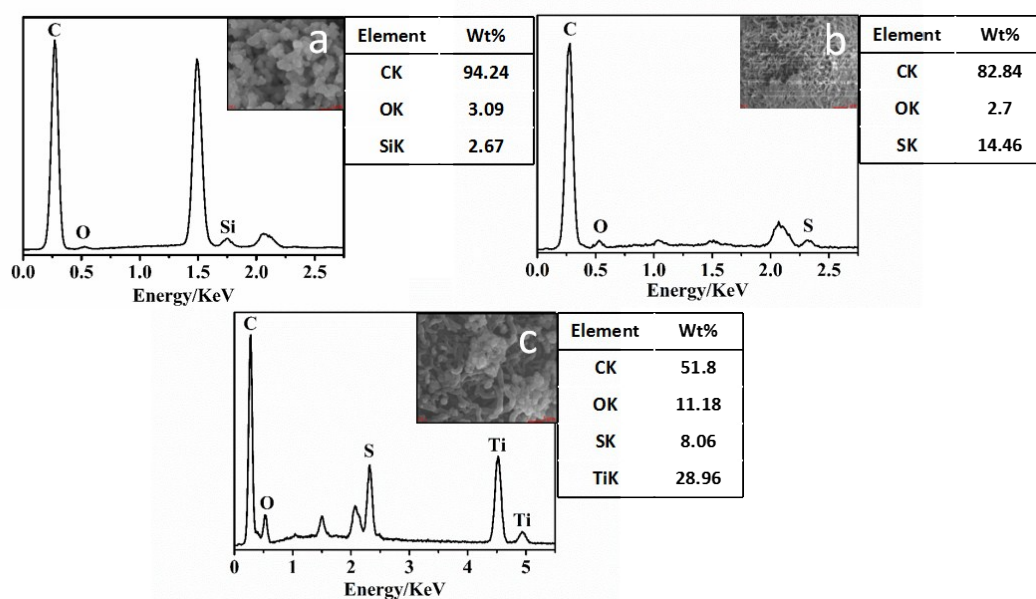

Figure S2 EDX spectra of the selected area (inset) of SiO<sub>2</sub>@PHS (a), HSPHS (b) and HSPHS@TiO<sub>2</sub> (c).

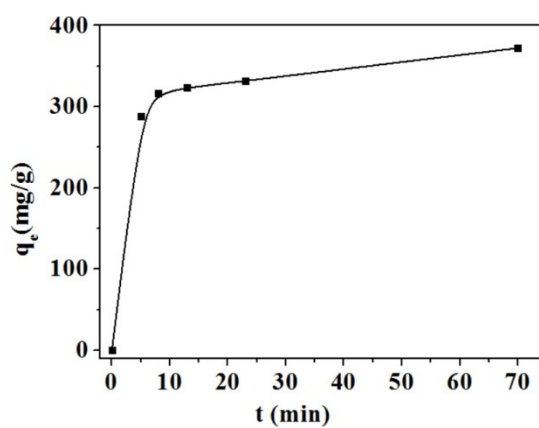

Figure S3 Adsorption kinetics of RB with HSPHS at room temperature. HSPHS-3: 1 mg, RB aqueous solution: 4 mL, 100 mg L<sup>-1</sup>.

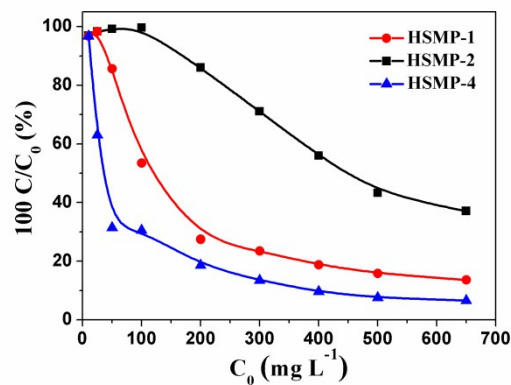

Figure S4 Adsorption percentage of RB by the Janus HSPHS with different morphologies under different initial RB concentrations. (HSPHS: 1 mg, RB aqueous solution: 4 mL).

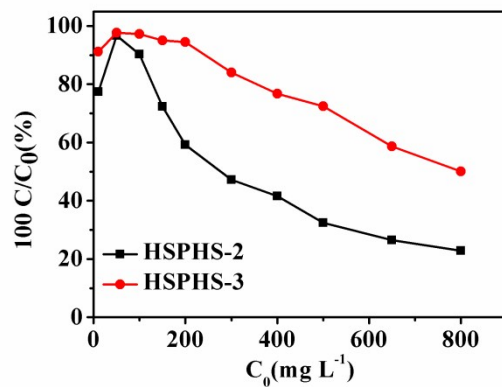

Figure S5 Adsorption percentage of RB by the Janus HSPHS with different sulfonation degree under different initial RB concentrations. (HSPHS: 1 mg, RB aqueous solution: 4 mL)

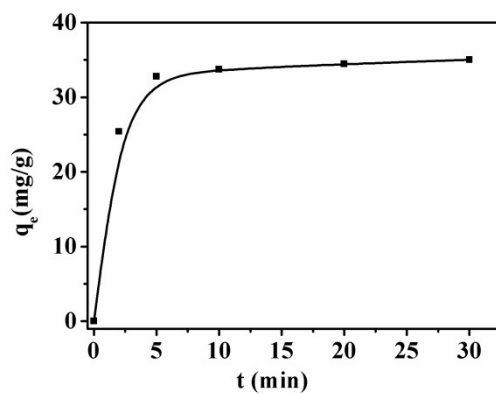

Figure S6 Adsorption kinetics of DMY with HSPHS at room temperature. HSPHS-3 aqueous

dispersion: 1 mL, 1 mg mL<sup>-1</sup>, DMY solution in hexane: 1 mL, 20 mg L<sup>-1</sup>.

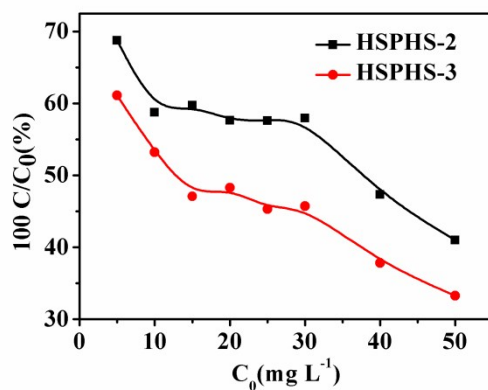

Figure S7 Adsorption percentage of DMY by various HSPHS under different initial MY concentrations. HSPHS aqueous dispersion: 1 mL, 1 mg mL<sup>-1</sup>, DMY solution in hexane: 1 mL, 20 mg L<sup>-1</sup>.

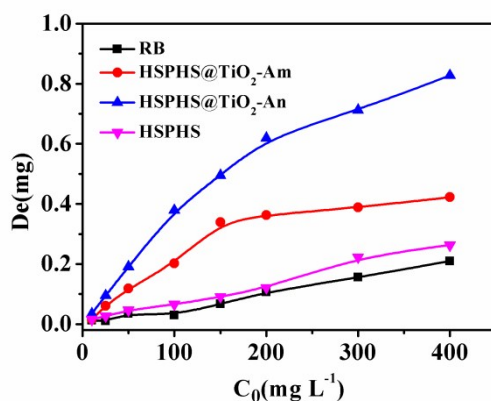

Figure S8 Photocatalytic degradative capacity of RB on various catalysts under different initial RB concentration. Catalysts 1 mg, RB solution 4 mL.
